# Supplementary material for: Structure of Polysaccharide from Dendrobium nobile Lindl. and Its Mode of Action on TLR4 to Exert Immunomodulatory Effects
Source: MDPI journal article supplement (doi:10.3390/foods13091356), 2024-04-28

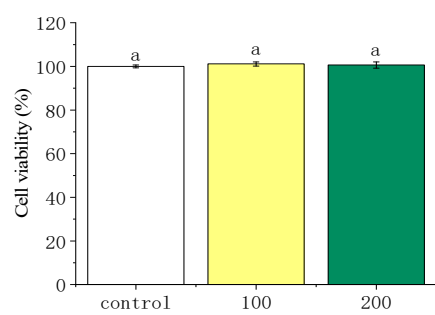

(A)

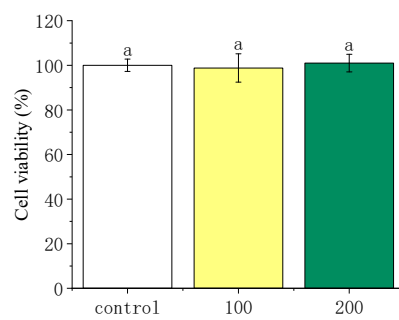

(B)

**Figure S1.** Effects of different concentrations of DNP1 on proliferation of RAW 264.7 macrophages after adding MD2-IN-1 (A) and TLR4-IN-C13 (B)

**Figure S2.** Total ion chromatogram of the partially methylated alditol acetates generated from DNP1, the mass spectra of specific partially methylated alditol acetates are shown below. In each mass spectrum the X axis denotes the  $m/z$  values whereas Y axis stands for relative abundance of the fragmented masses.

#### Abundance

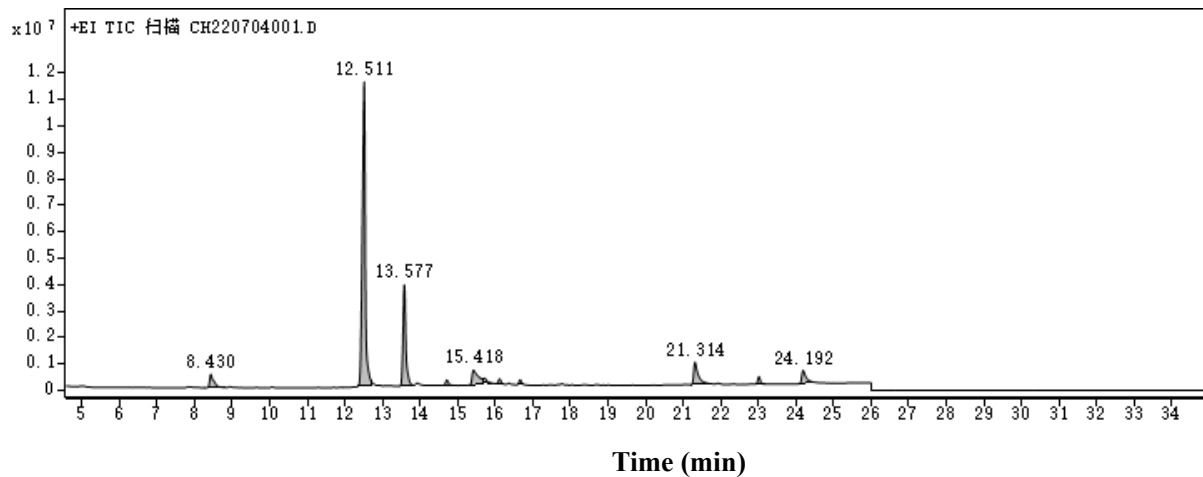

#### 1. Mass spectrum of T-Man<sub>p</sub> (1,5-di-O-acetyl-2,3,4,6-tetra-O-methyl mannitol)

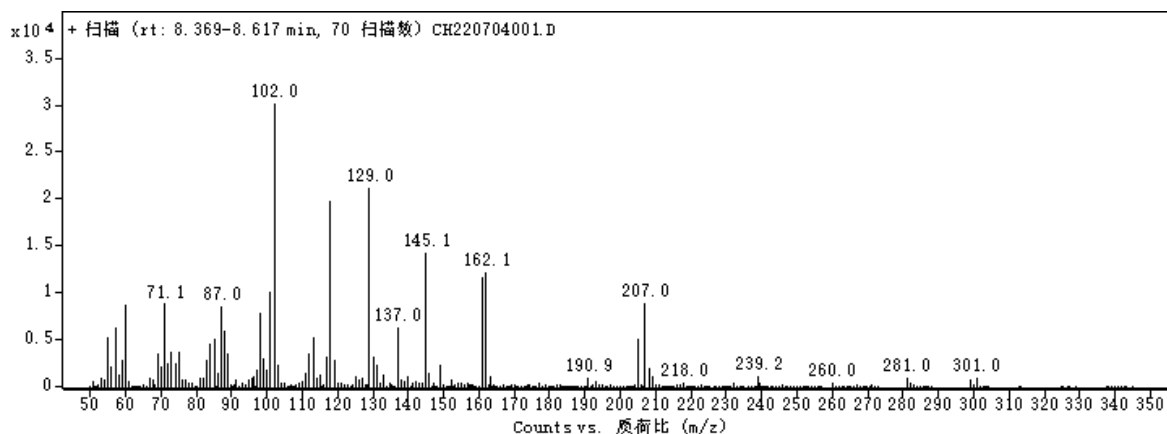

#### 2. Mass spectrum of 1,4-Man<sub>p</sub> (1,4,5-tri-O-acetyl-2,3,6-tri-O-methyl mannitol)

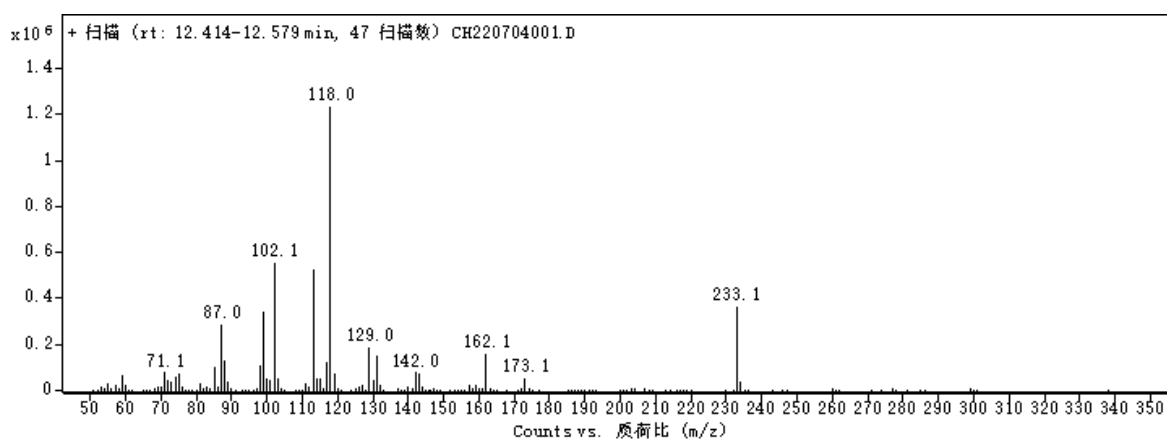

### 3. Mass spectrum of 1,4-Glcp (1,4,5-tri-O-acetyl-2,3,6-tri-O-methyl glucitol)

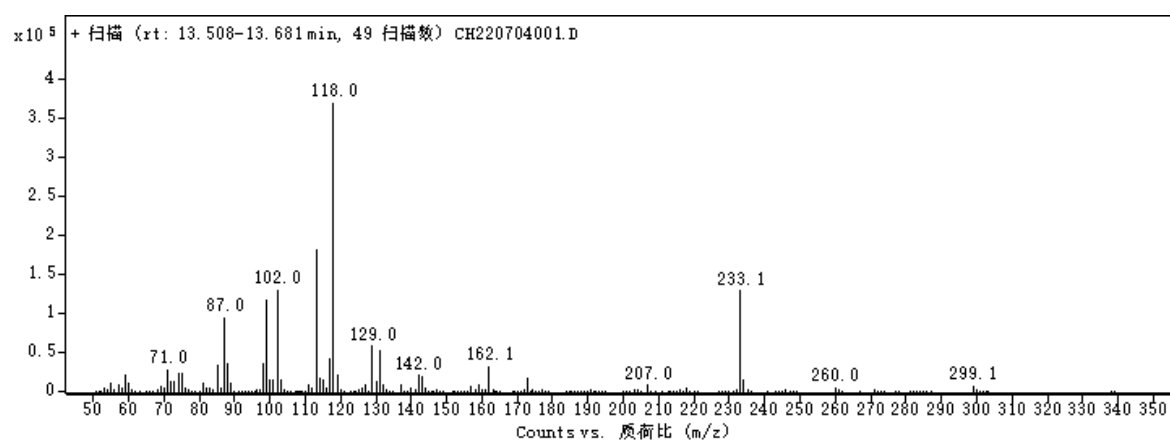

**Figure S3.** The figure of homogeneity of DNP1.

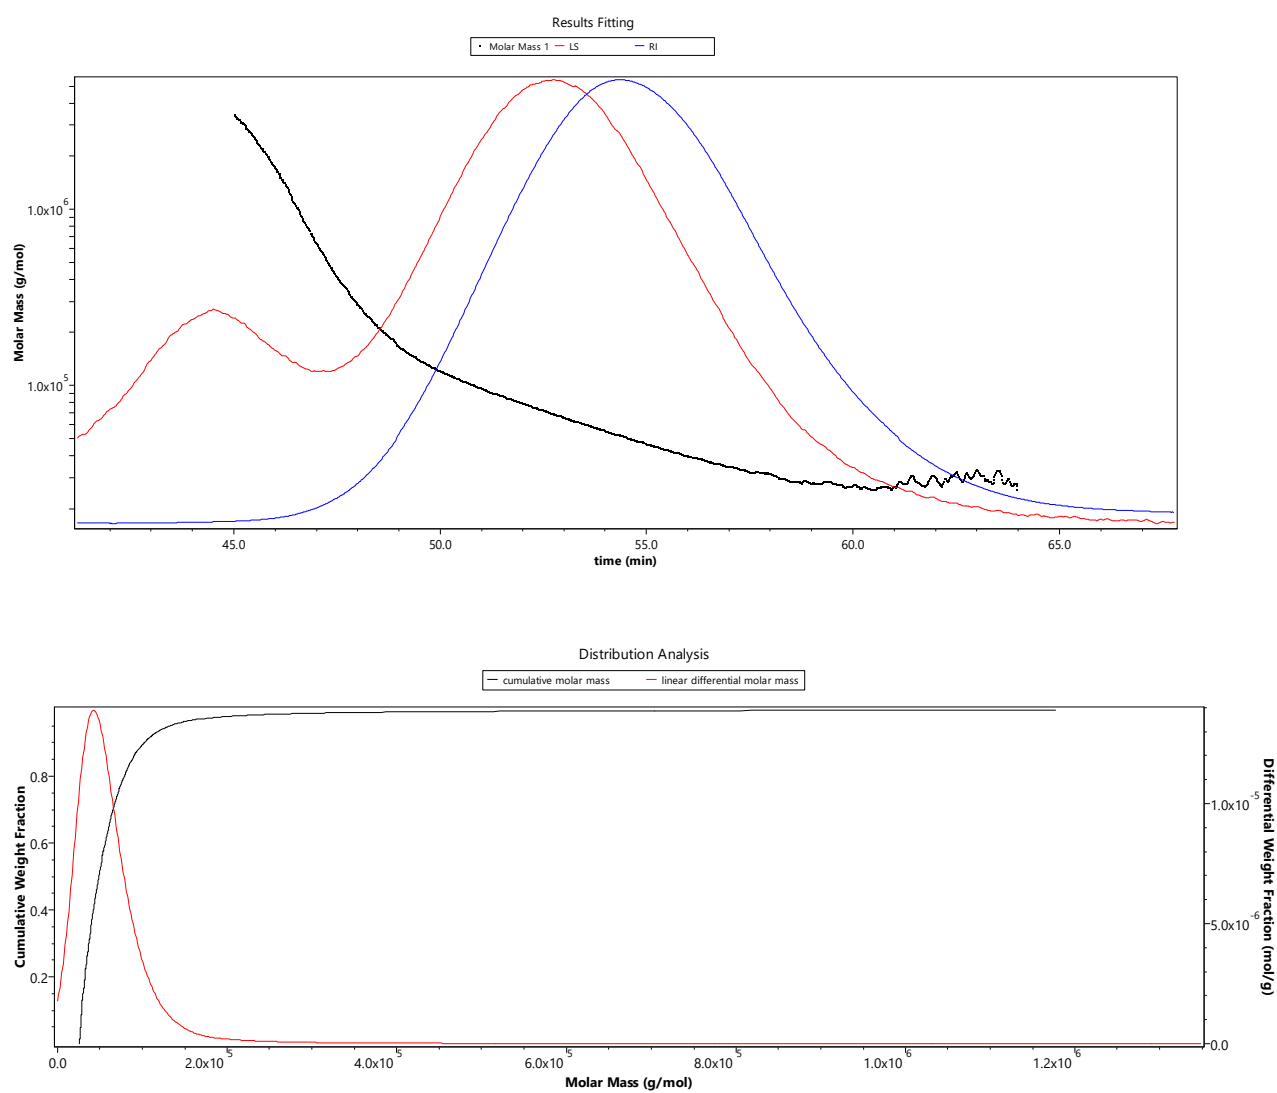

Supplement: s1 [file s1]
